# Supplementary material for: Effect of mid-term drought on Quercus pubescens BVOC emissions seasonality and their dependence to light and/or temperature
Source: Copernicus journal article supplement (doi:10.5194/acp-2016-836), 2016-10-07
Supplement: Supplementary file 1 [file acp-2016-836-supplement.pdf]

**Table S1:** Parameters used to calculate the modelled emissions with L+T or T algorithms, specific standardised emissions factors for L+T algorithm ( $EF_{L+T}$ ), specific standardised emissions factors for T algorithm ( $ER_T$ ) and experimental coefficient  $\beta$ . Means  $\pm$  se, n = 5.

**Table S1:**

| Compounds        | Treatment | Spring         |                |                | Summer          |                |                | Autumn         |                |                |
|------------------|-----------|----------------|----------------|----------------|-----------------|----------------|----------------|----------------|----------------|----------------|
|                  |           | $EF_{L+T}$     | $EF_T$         | $\beta$        | $EF_{L+T}$      | $EF_T$         | $\beta$        | $EF_{L+T}$     | $EF_T$         | $\beta$        |
| Isoprene         | ND        | 28.5 $\pm$ 4.6 |                |                | 118.0 $\pm$ 8.4 |                |                | 6.4 $\pm$ 1.1  |                |                |
|                  | AD        | 17.8 $\pm$ 2.4 |                |                | 84.8 $\pm$ 9.0  |                |                | 12.0 $\pm$ 2.8 |                |                |
| MACR+MVK+ISOPOOH | ND        | 0.2 $\pm$ 0.03 | 0.7 $\pm$ 0.15 | 0.5 $\pm$ 0.01 | 0.3 $\pm$ 0.02  | 0.4 $\pm$ 0.1  | 0.5 $\pm$ 0.1  | 0.1 $\pm$ 0.01 | 1.6 $\pm$ 0.3  | 0.7 $\pm$ 0.1  |
|                  | AD        | 0.1 $\pm$ 0.01 | 0.9 $\pm$ 0.28 | 0.6 $\pm$ 0.04 | 0.2 $\pm$ 0.03  | 0.2 $\pm$ 0.04 | 0.6 $\pm$ 0.1  | 0.1 $\pm$ 0.02 | 5.0 $\pm$ 1.6  | 0.9 $\pm$ 0.03 |
| Methanol         | ND        | 1.0 $\pm$ 0.2  | 2.6 $\pm$ 0.8  | 0.3 $\pm$ 0.1  | 0.7 $\pm$ 0.04  | 0.9 $\pm$ 0.04 | 0.3 $\pm$ 0.04 | 0.3 $\pm$ 0.1  | 1.1 $\pm$ 0.3  | 0.4 $\pm$ 0.1  |
|                  | AD        | 0.8 $\pm$ 0.1  | 2.2 $\pm$ 0.2  | 0.3 $\pm$ 0.04 | 0.5 $\pm$ 0.1   | 0.6 $\pm$ 0.04 | 0.3 $\pm$ 0.1  | 0.4 $\pm$ 0.1  | 1.4 $\pm$ 0.4  | 0.4 $\pm$ 0.04 |
| Acetone          | ND        | 0.6 $\pm$ 0.2  | 1.8 $\pm$ 0.5  | 0.4 $\pm$ 0.01 | 0.9 $\pm$ 0.1   | 1.1 $\pm$ 0.2  | 0.4 $\pm$ 0.1  | 0.6 $\pm$ 0.2  | 2.4 $\pm$ 0.6  | 0.4 $\pm$ 0.03 |
|                  | AD        | 0.5 $\pm$ 0.1  | 2.1 $\pm$ 0.4  | 0.5 $\pm$ 0.02 | 0.4 $\pm$ 0.03  | 0.5 $\pm$ 0.1  | 0.3 $\pm$ 0.1  | 0.8 $\pm$ 0.3  | 4.3 $\pm$ 1.8  | 0.5 $\pm$ 0.1  |
| Formaldehyde     | ND        | 0.3 $\pm$ 0.1  | 0.8 $\pm$ 0.2  | 0.4 $\pm$ 0.02 | 0.3 $\pm$ 0.03  | 0.4 $\pm$ 0.1  | 0.4 $\pm$ 0.1  | 0.4 $\pm$ 0.1  | 1.6 $\pm$ 0.4  | 0.4 $\pm$ 0.04 |
|                  | AD        | 0.2 $\pm$ 0.02 | 1.3 $\pm$ 0.2  | 0.5 $\pm$ 0.03 | 0.2 $\pm$ 0.03  | 0.2 $\pm$ 0.1  | 0.4 $\pm$ 0.2  | 0.6 $\pm$ 0.1  | 2.7 $\pm$ 0.7  | 0.5 $\pm$ 0.02 |
| Acetaldehyde     | ND        | 2.4 $\pm$ 0.7  | 9.4 $\pm$ 2.7  | 0.5 $\pm$ 0.03 | 1.7 $\pm$ 0.4   | 1.6 $\pm$ 0.3  | 0.4 $\pm$ 0.1  | 2.5 $\pm$ 0.6  | 34.0 $\pm$ 3.1 | 0.7 $\pm$ 0.02 |
|                  | AD        | 2.1 $\pm$ 0.9  | 7.9 $\pm$ 4.2  | 0.5 $\pm$ 0.1  | 0.9 $\pm$ 0.1   | 0.9 $\pm$ 0.1  | 0.5 $\pm$ 0.1  | 2.5 $\pm$ 0.7  | 37.8 $\pm$ 4.3 | 0.7 $\pm$ 0.1  |

**Figure S1:** Diurnal pattern of measured MACR+MVK+ISOPOOH emissions rates ( $\mu\text{gC.g}_{\text{DM}}^{-1}.\text{h}^{-1}$ ). Points (means  $\pm$  SE, n=5) represent measured emissions, yellow line is  $\text{ER}_{\text{L+T}}$  and dotted line is  $\text{ER}_{\text{T}}$  according to treatment and season.  $R^2$  and slope (sl) of correlations between measured and modelled emissions were presented in yellow frame for L+T and in white frame for T.

**Figure S2:** Diurnal pattern of measured acetone emissions rates ( $\mu\text{gC.g}_{\text{DM}}^{-1}.\text{h}^{-1}$ ). Points (means  $\pm$  SE, n=5) represent measured emissions, yellow line is  $\text{ER}_{\text{L+T}}$  and dotted line is  $\text{ER}_{\text{T}}$  according to treatment and season.  $R^2$  and slope (sl) of correlations between measured and modelled emissions were presented in yellow frame for L+T and in white frame for T.

**Figure S3:** Diurnal pattern of measured formaldehyde emissions rate ( $\mu\text{gC.g}_{\text{DM}}^{-1}.\text{h}^{-1}$ ). Points (means  $\pm$  SE, n=5) represent measured emissions, yellow line is  $\text{ER}_{\text{L+T}}$  and dotted line is  $\text{ER}_{\text{T}}$  according to treatment and seasons.  $R^2$  and slope (sl) of correlations between measured and modelled emissions were presented in yellow frame for L+T and in white frame for T.

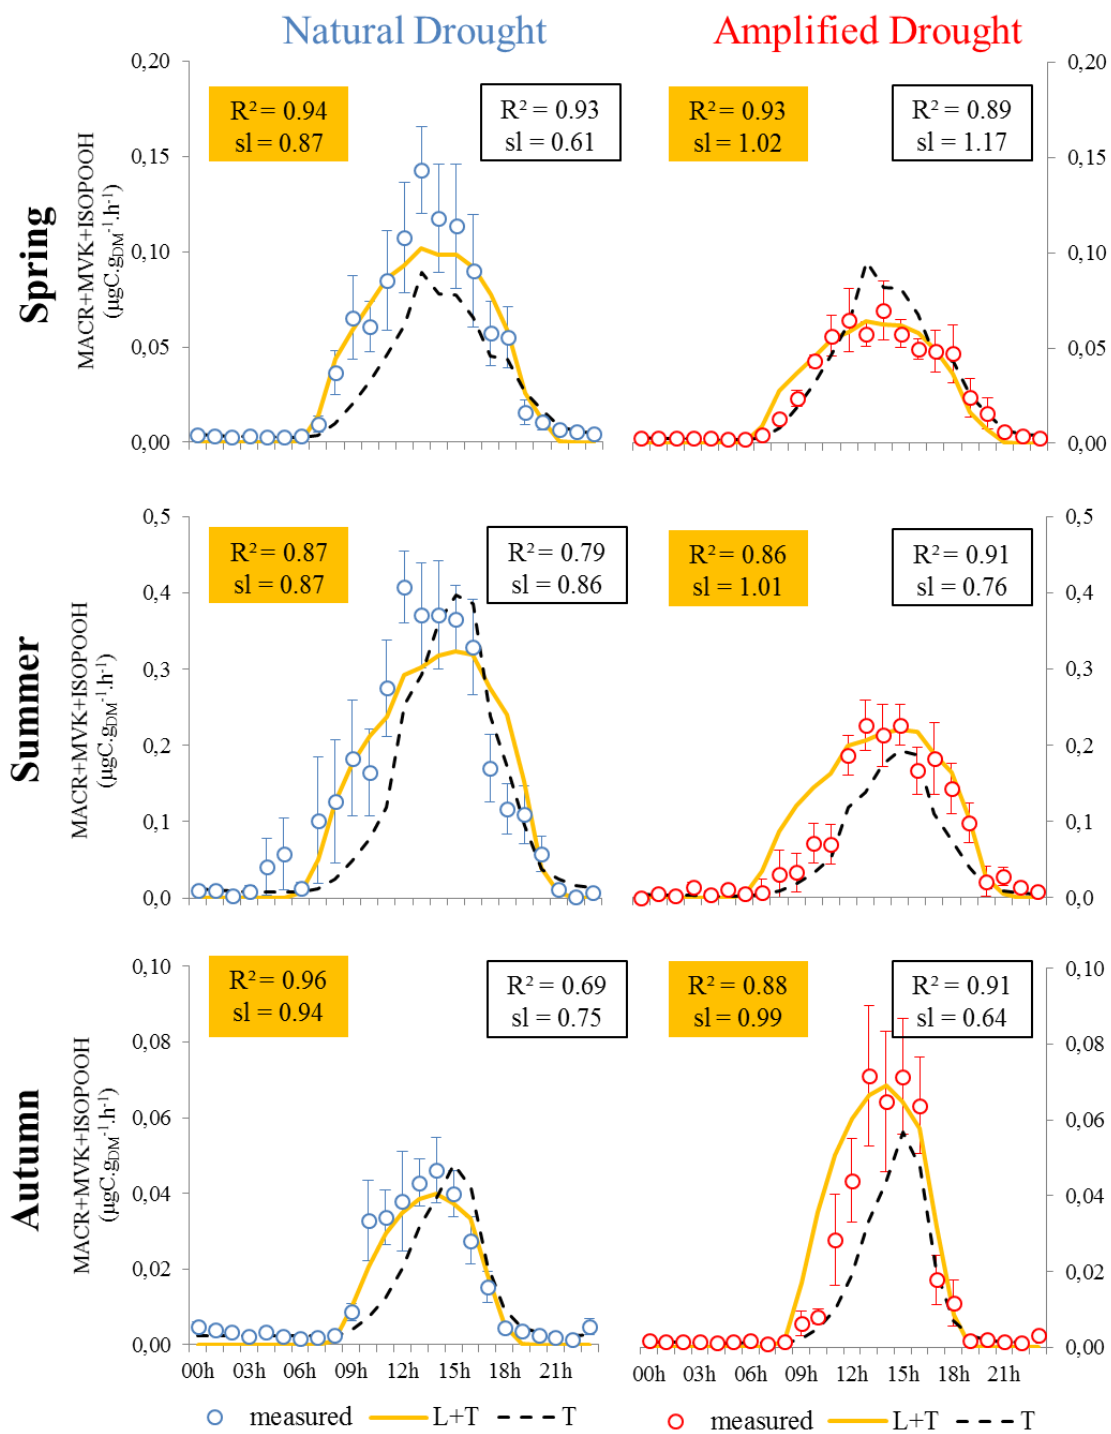

**Figure S1:**

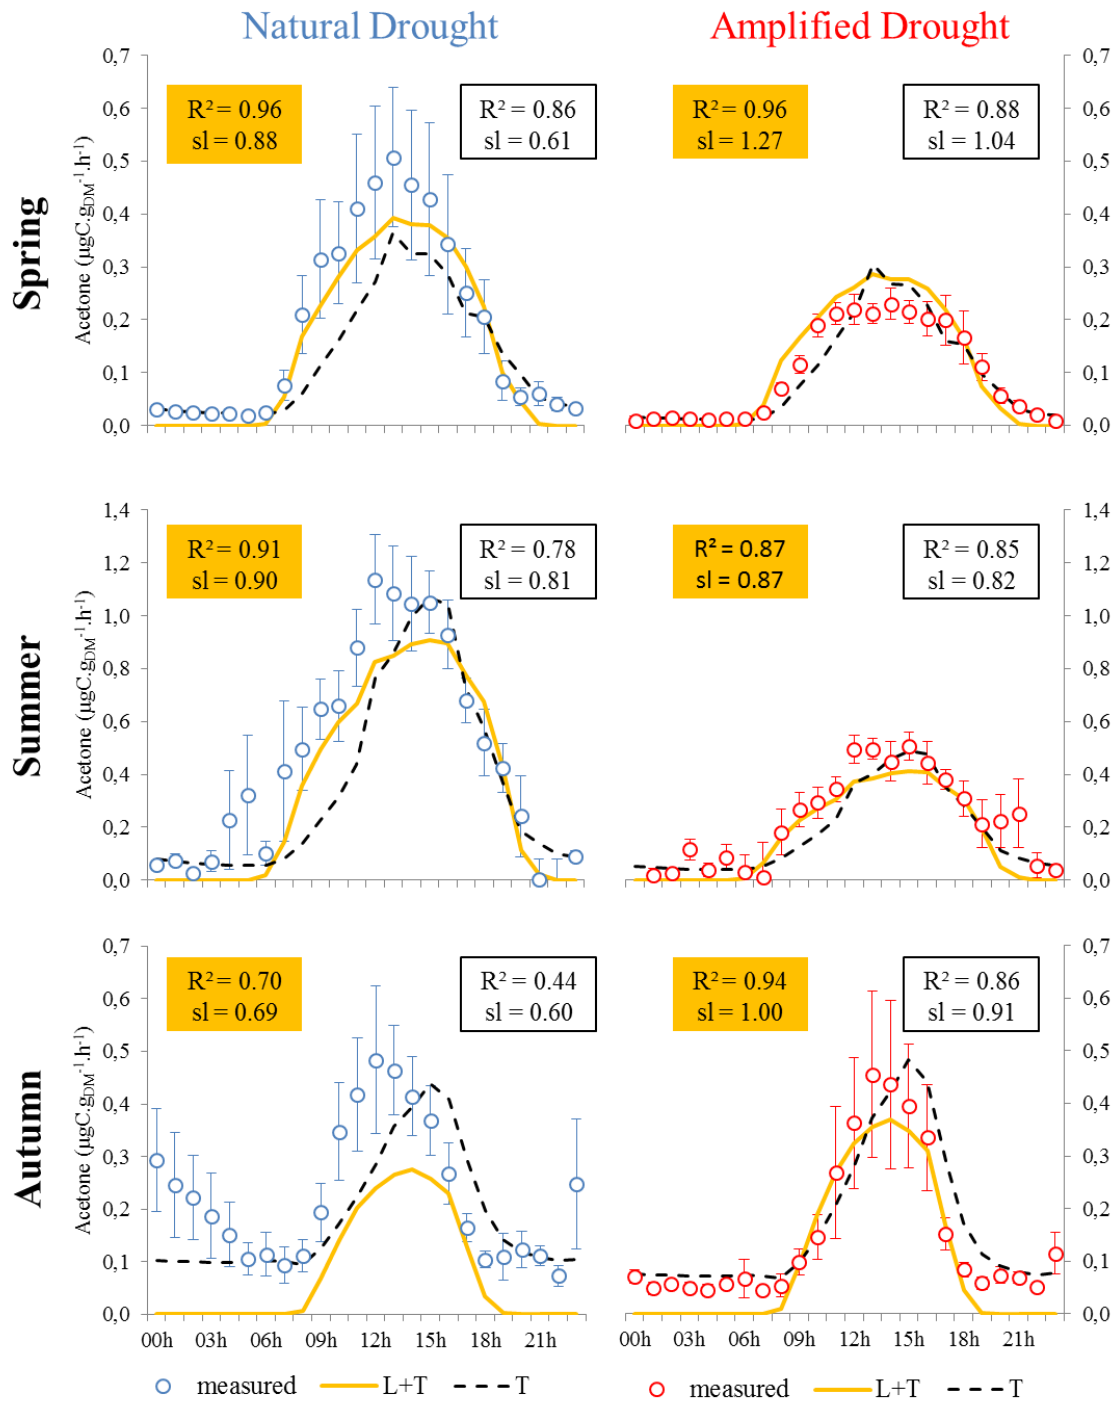

**Figure S2:**

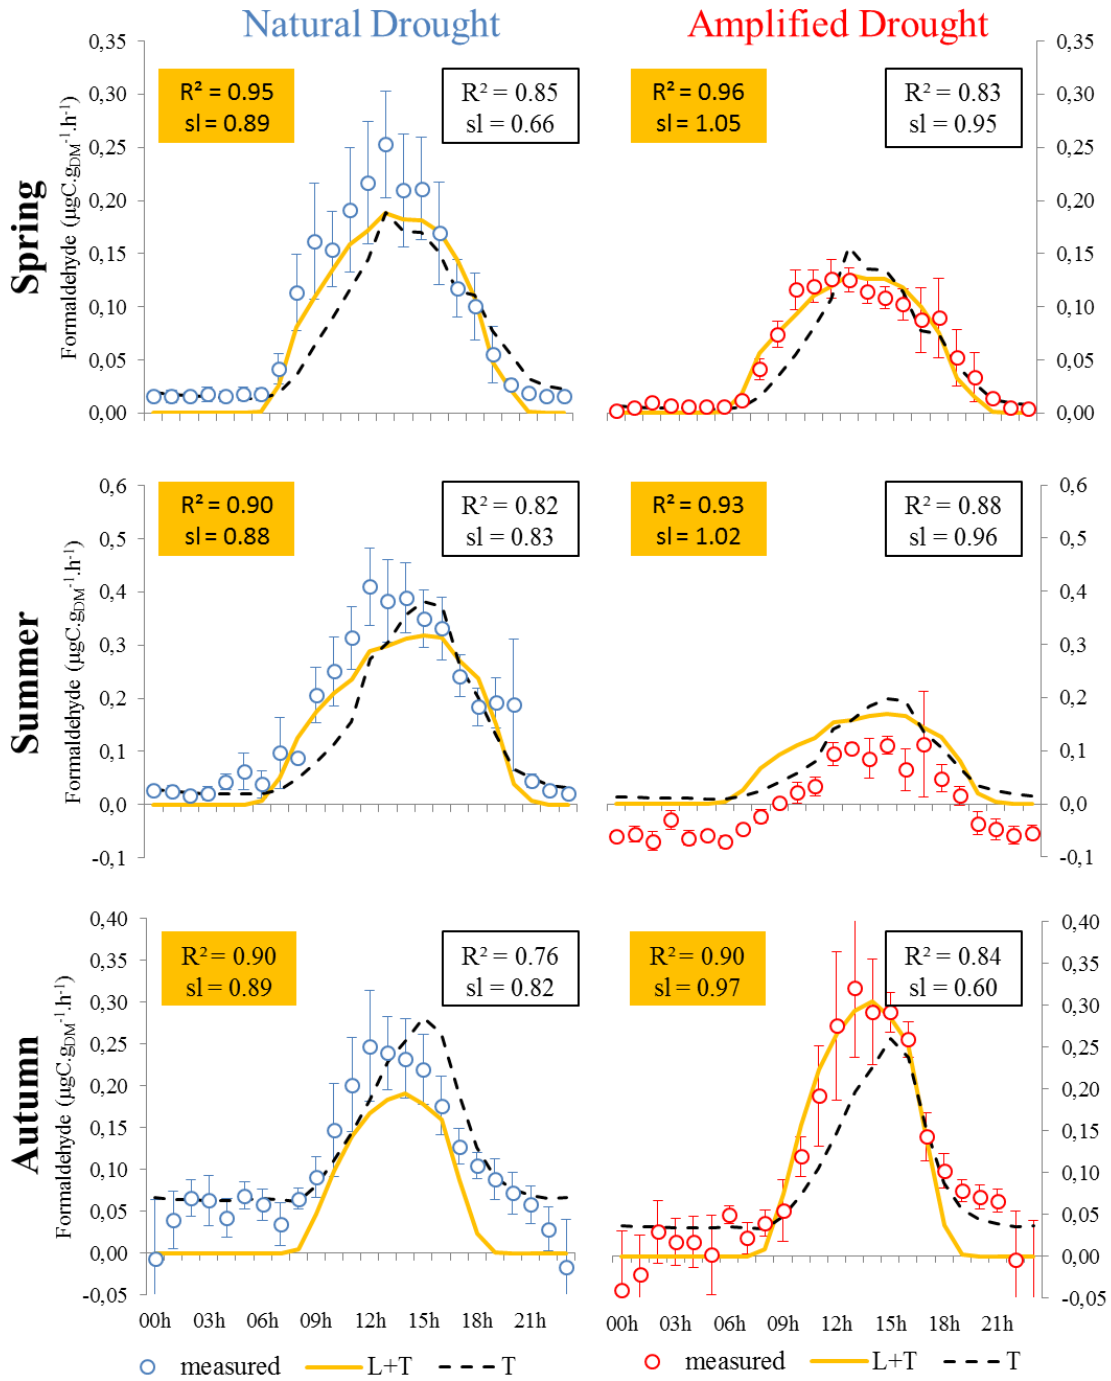

**Figure S3:**
